# Supplementary material
Source: PubMed Central journal article supplement (PMC2937987)

**Figure S1**

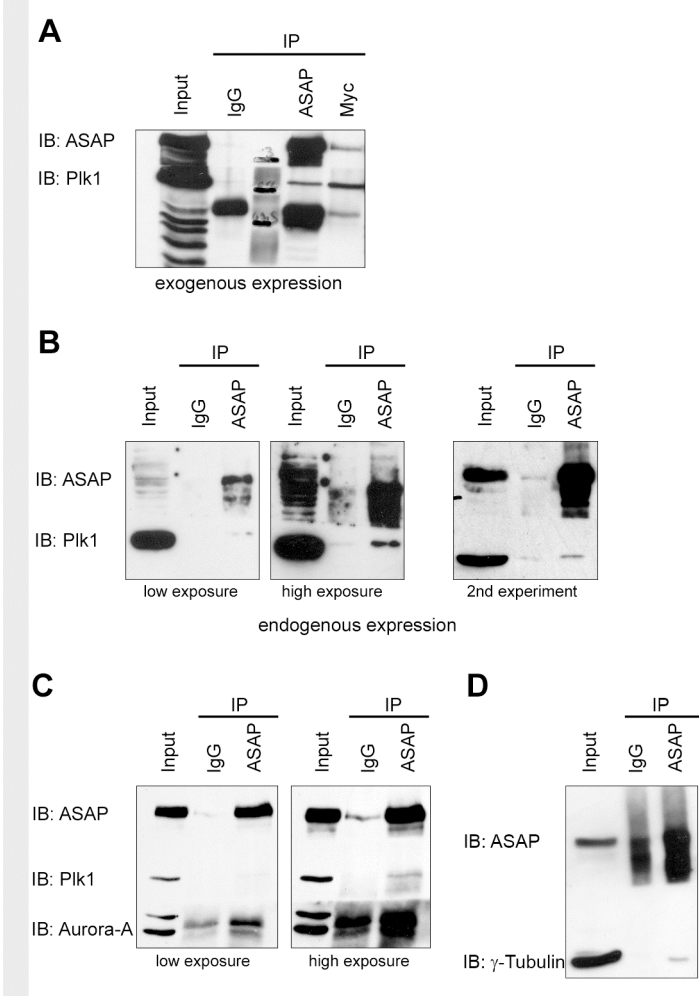

**Figure S2**

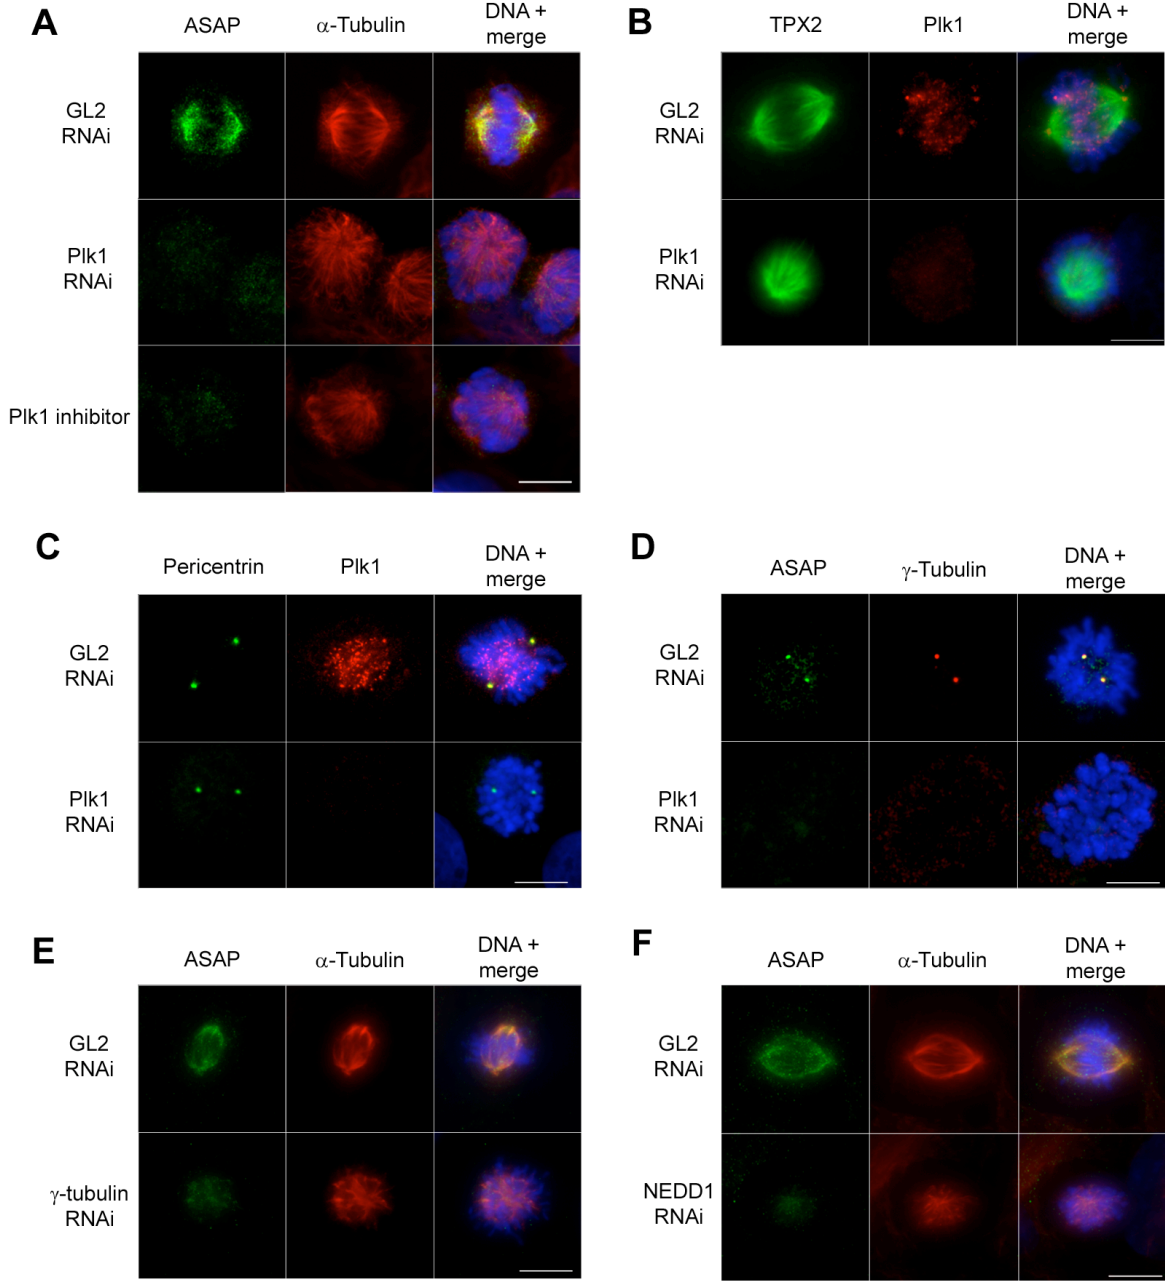

Figure S3

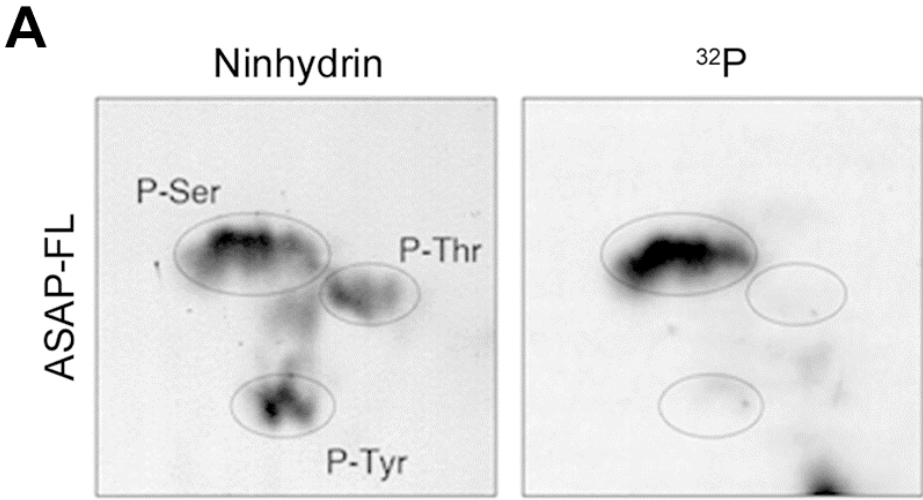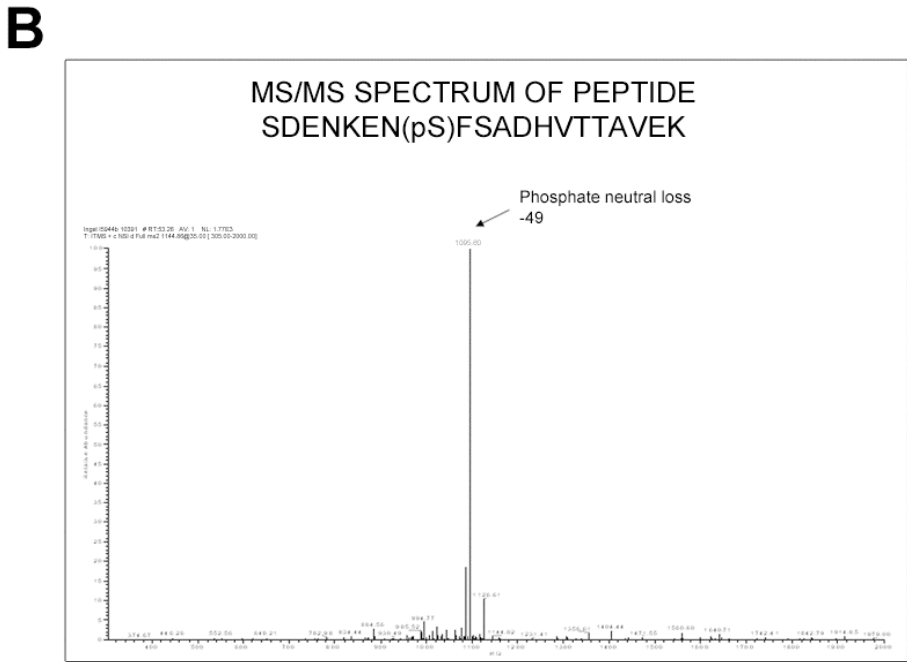

Figure S4

**A**

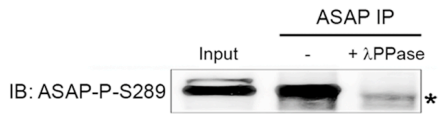

**B**

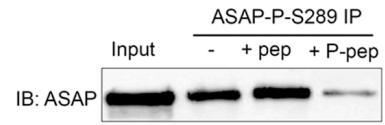

**C**

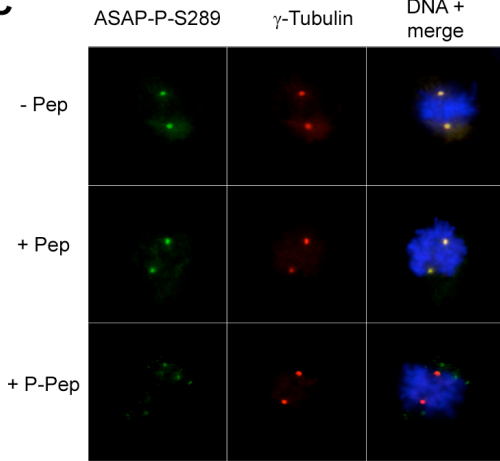

**D**

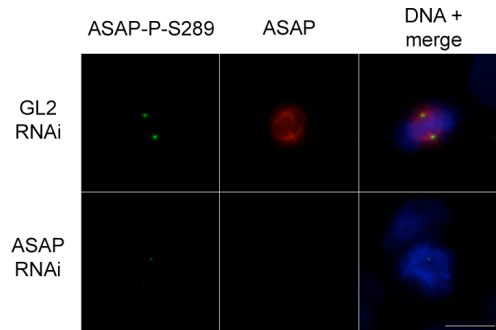

**E**

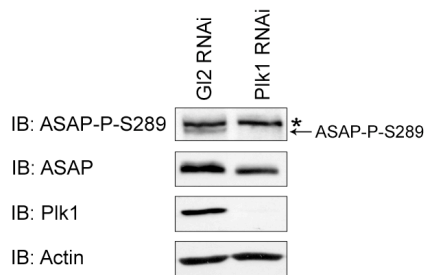

**F**

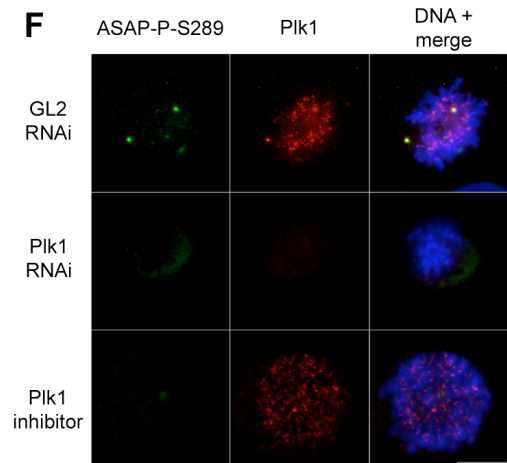

Figure S5

**A**

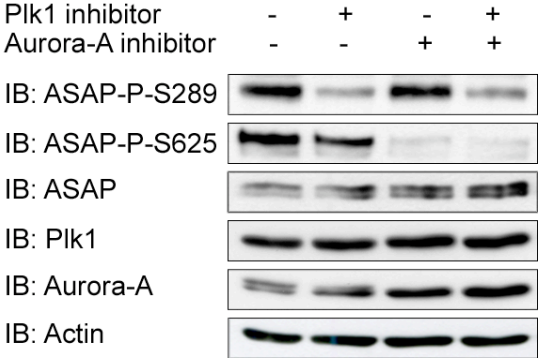

**B**

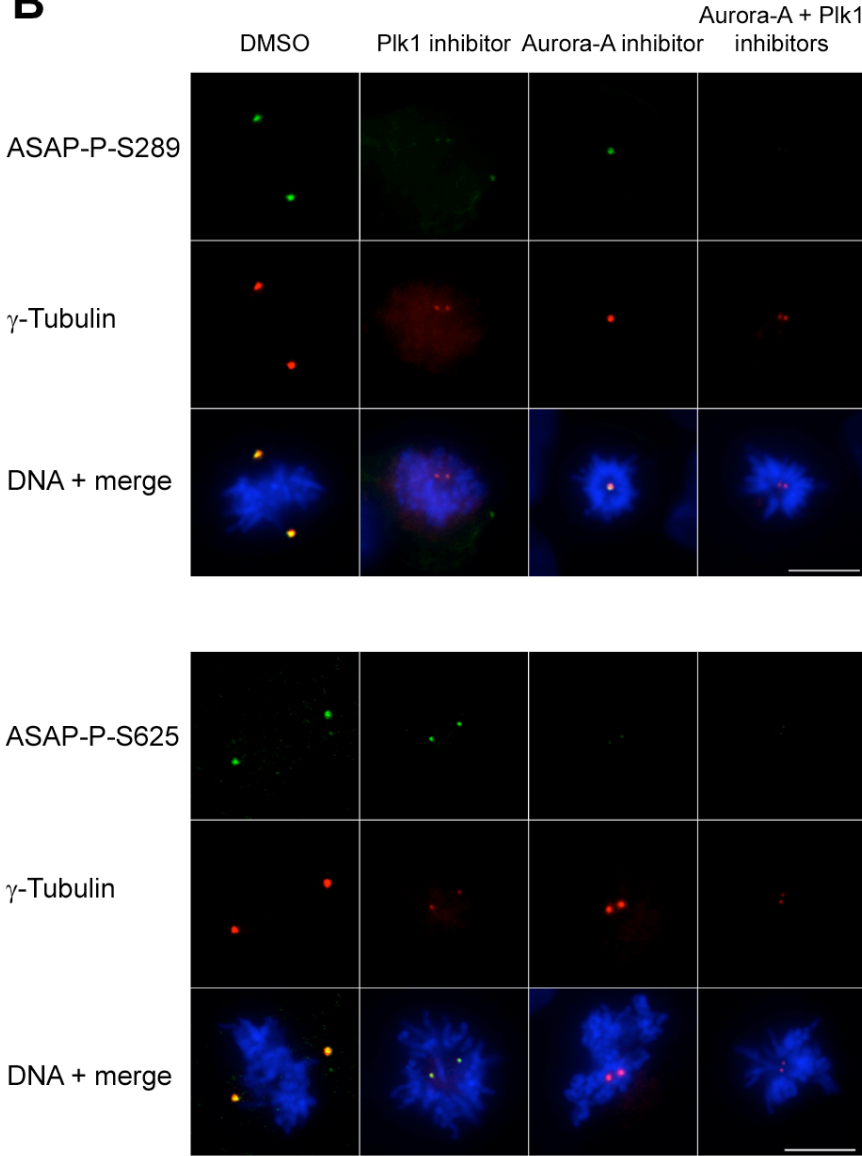

Figure S6

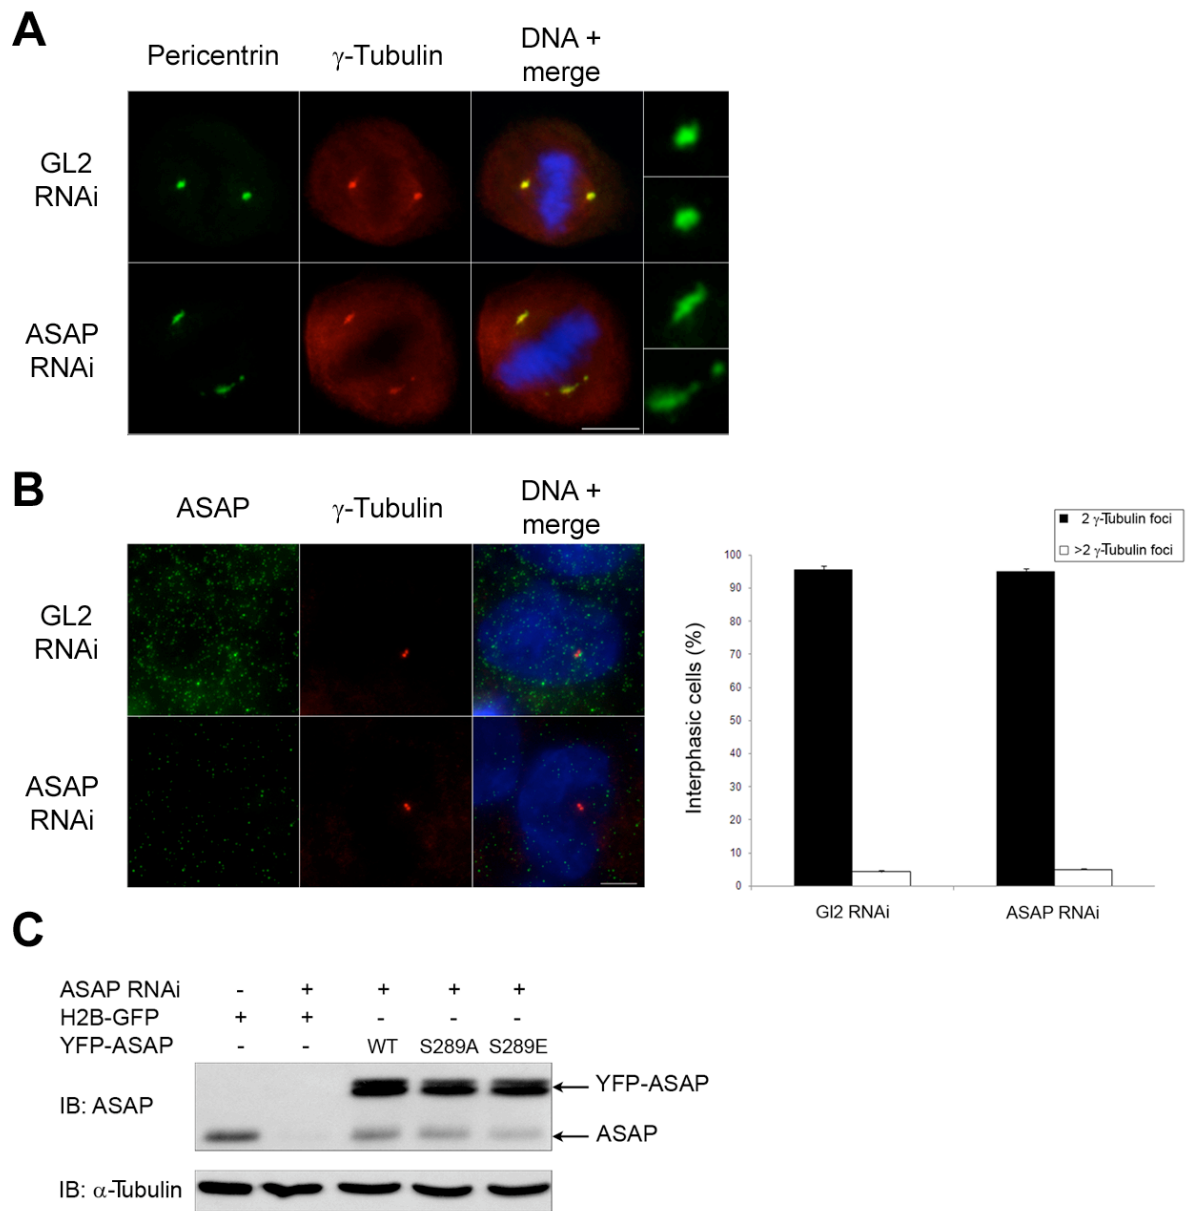

Supplement: supp_M110.144220_supplemental_figures.pdf [file supp_M110.144220_supplemental_figures.pdf]
